# Supplementary material
Source: PubMed Central journal article supplement (PMC5117258)

Supplementary Figure 1

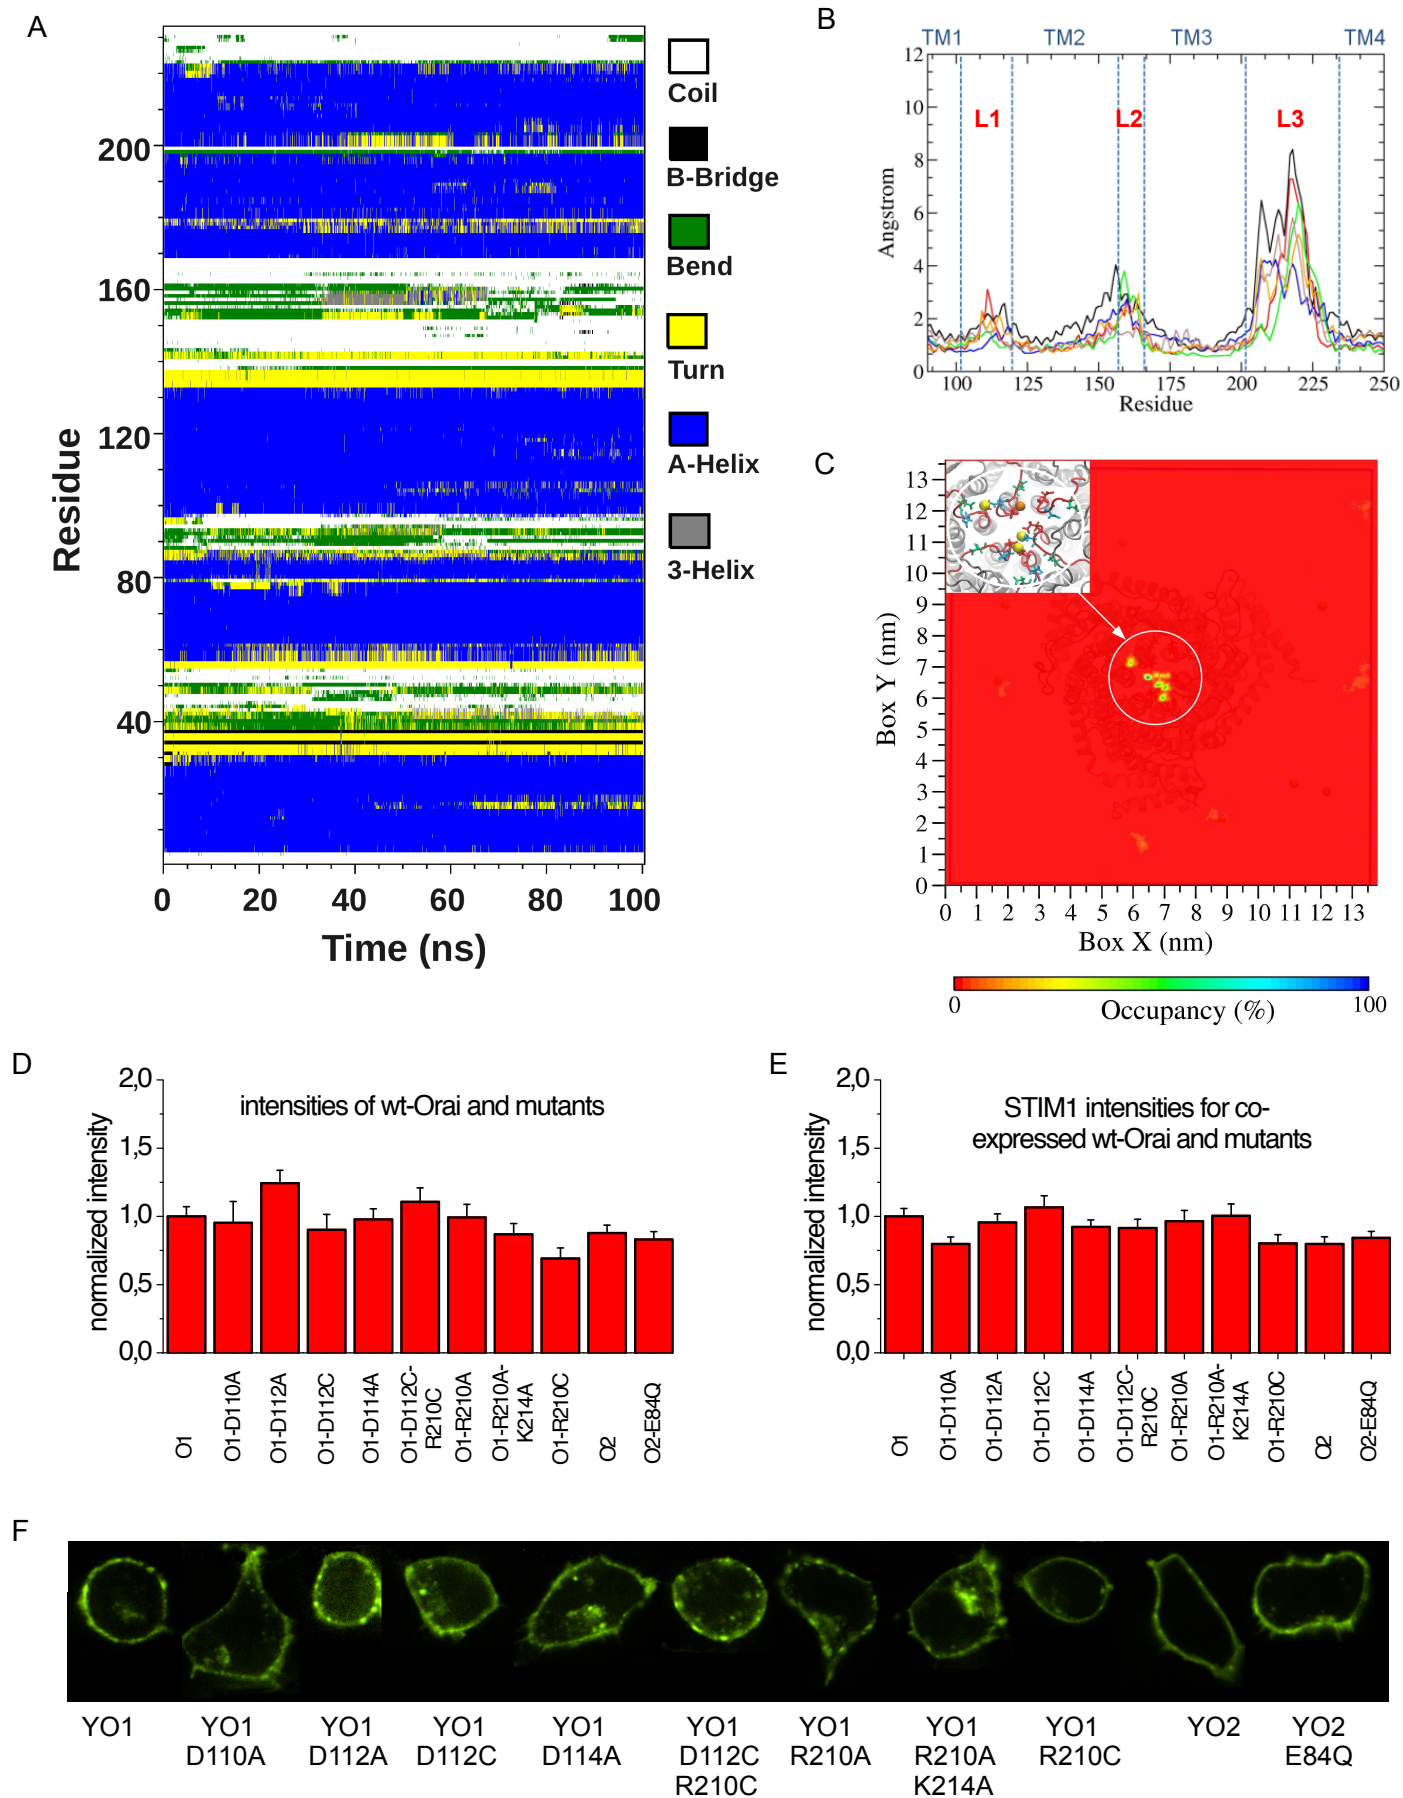

Supplementary Figure 2

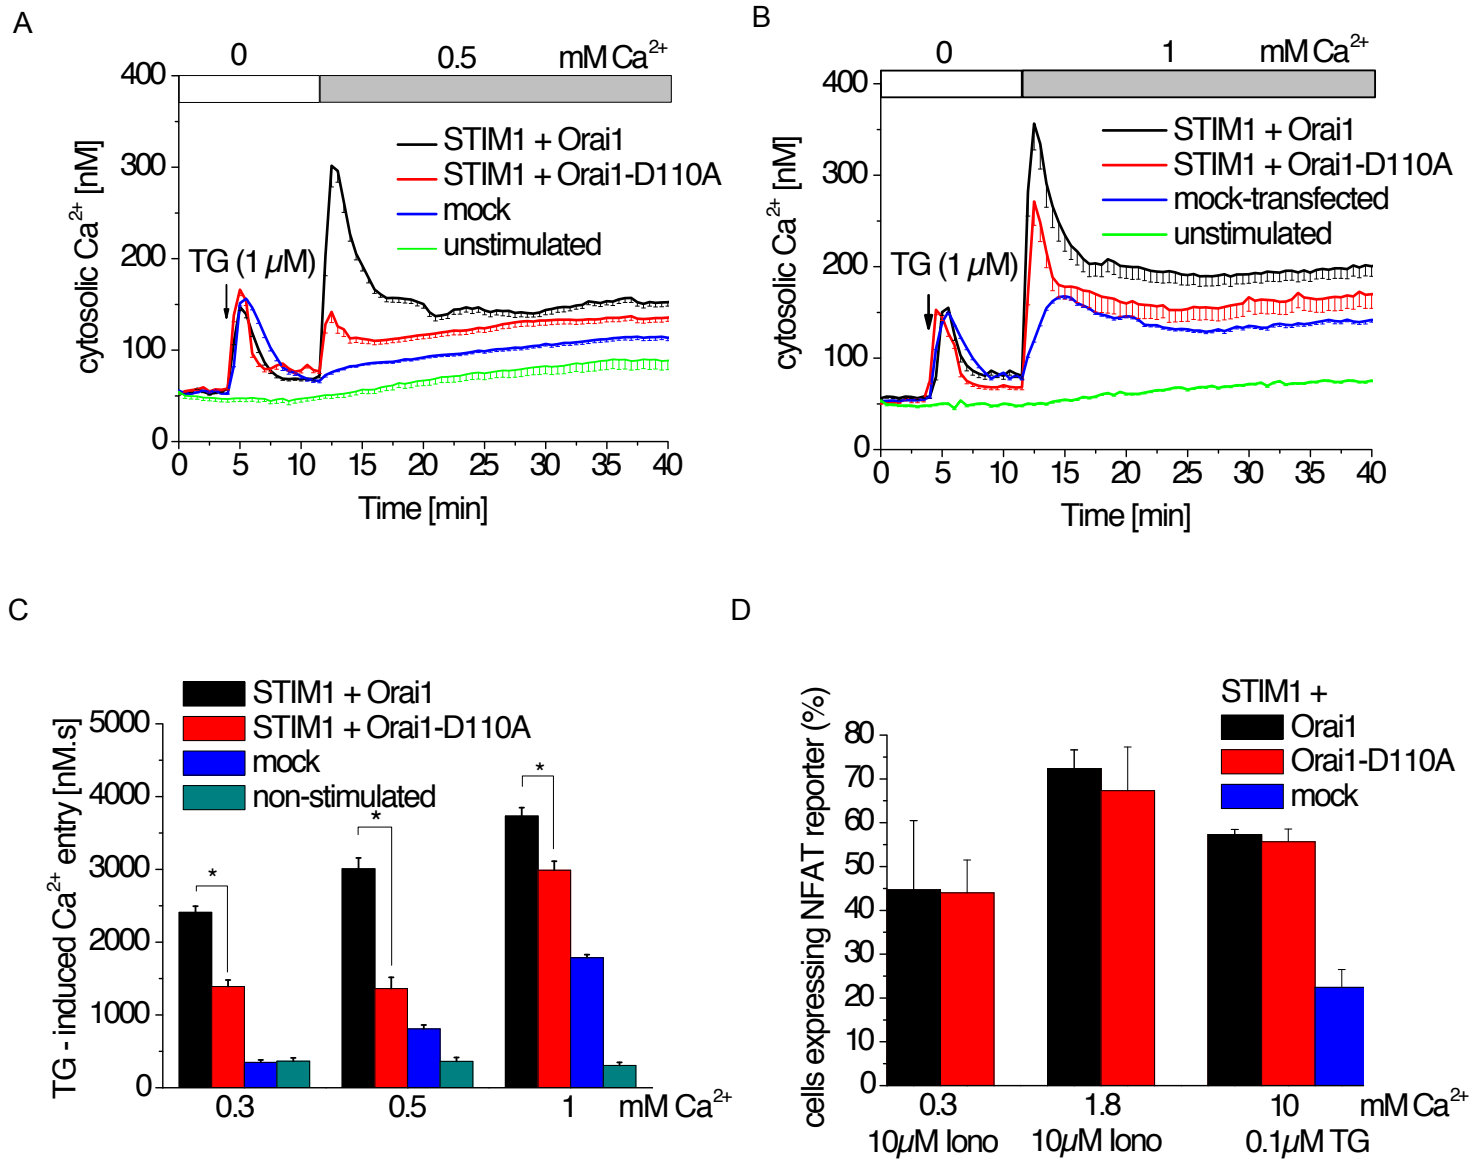

Supplementary Figure 3

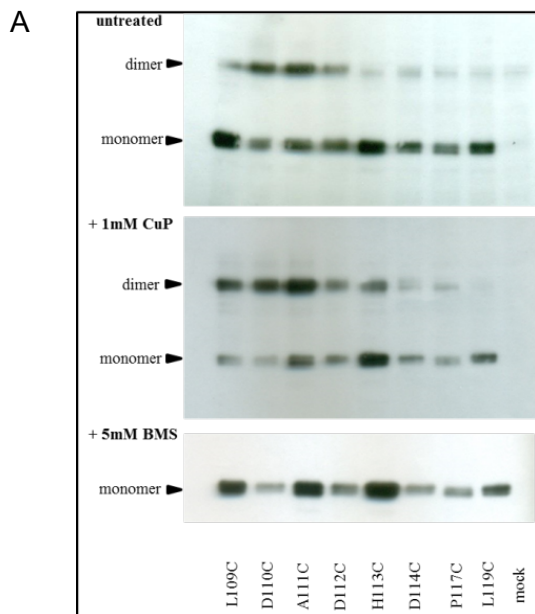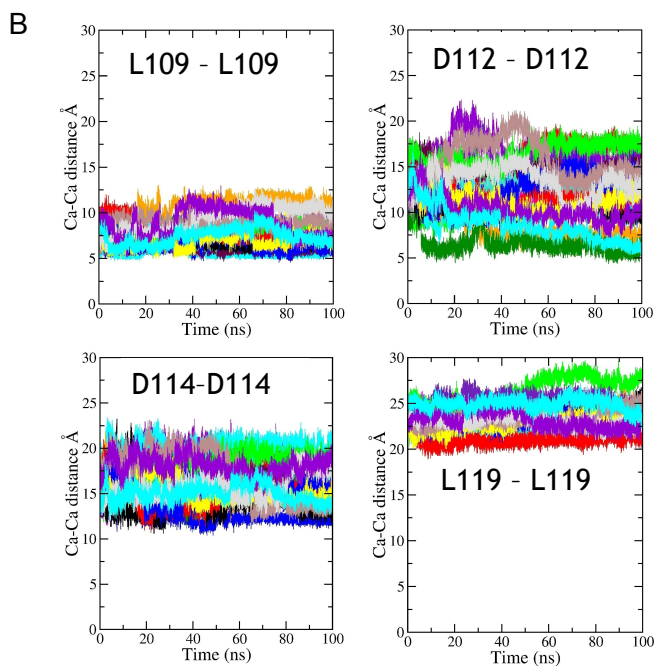

Supplementary Figure 4

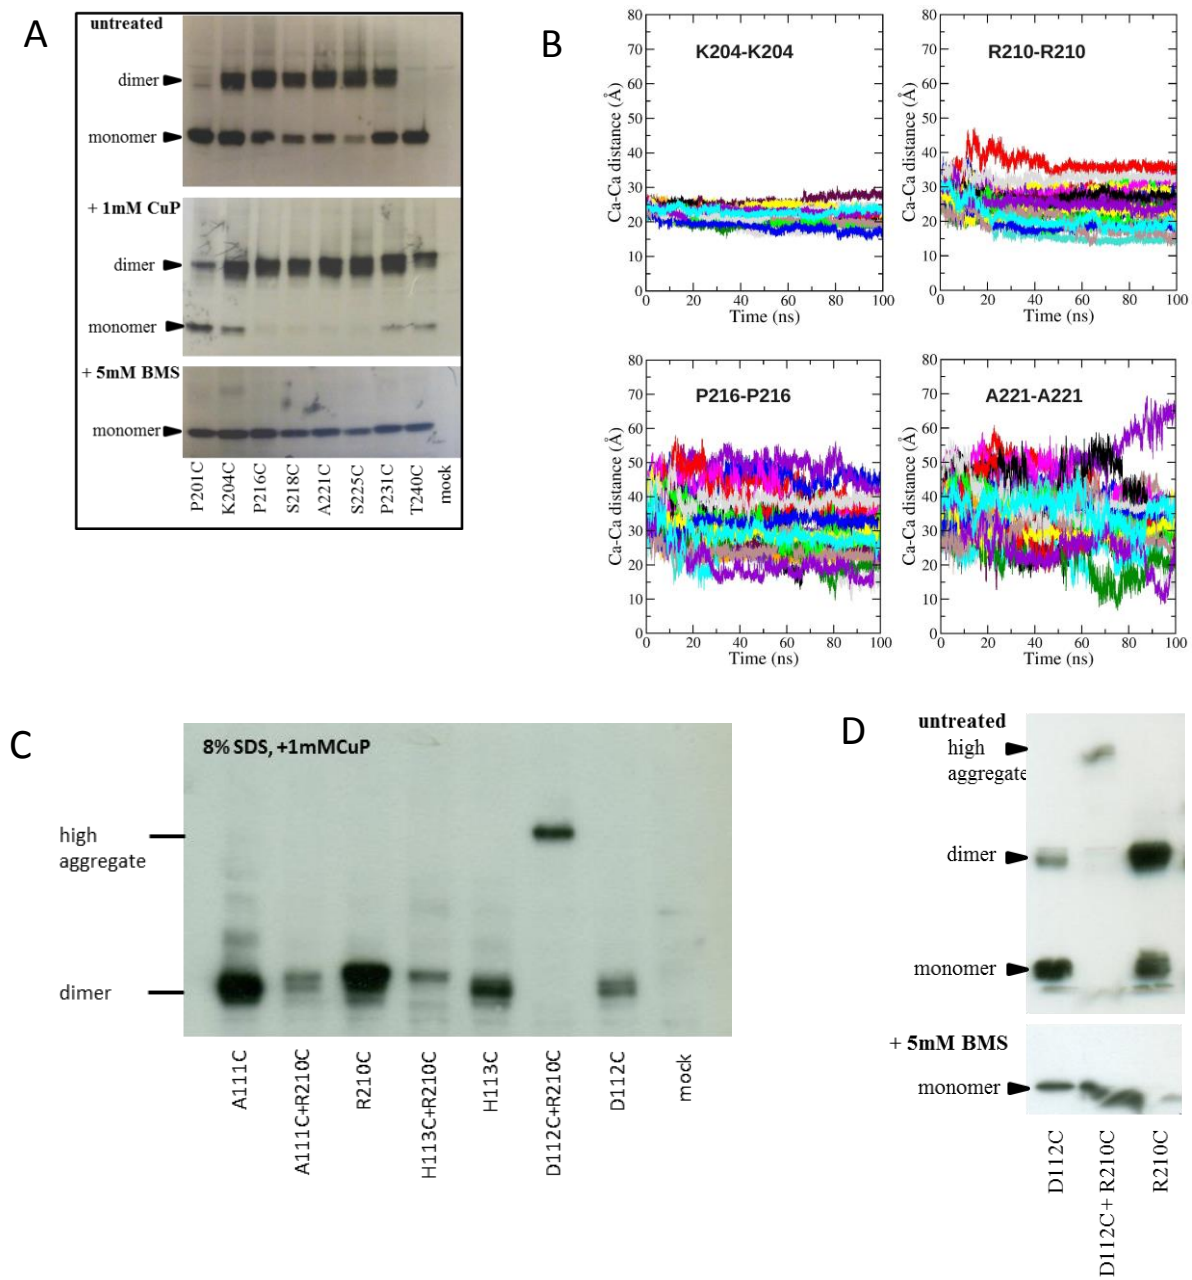

Supplementary Figure 5

A

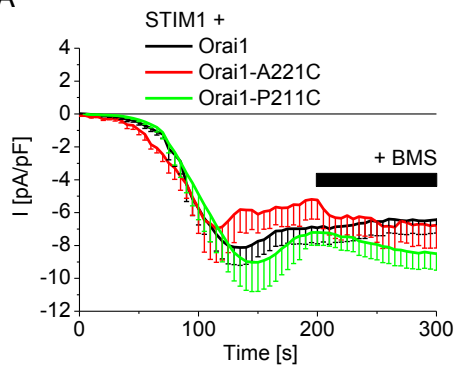

B

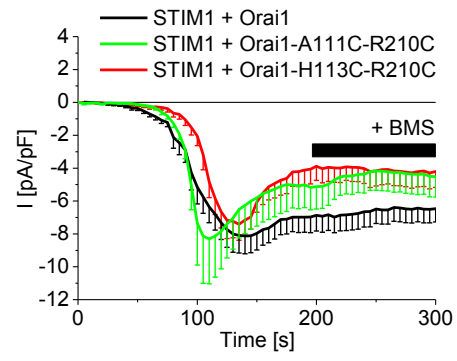

Supplementary Figure 6

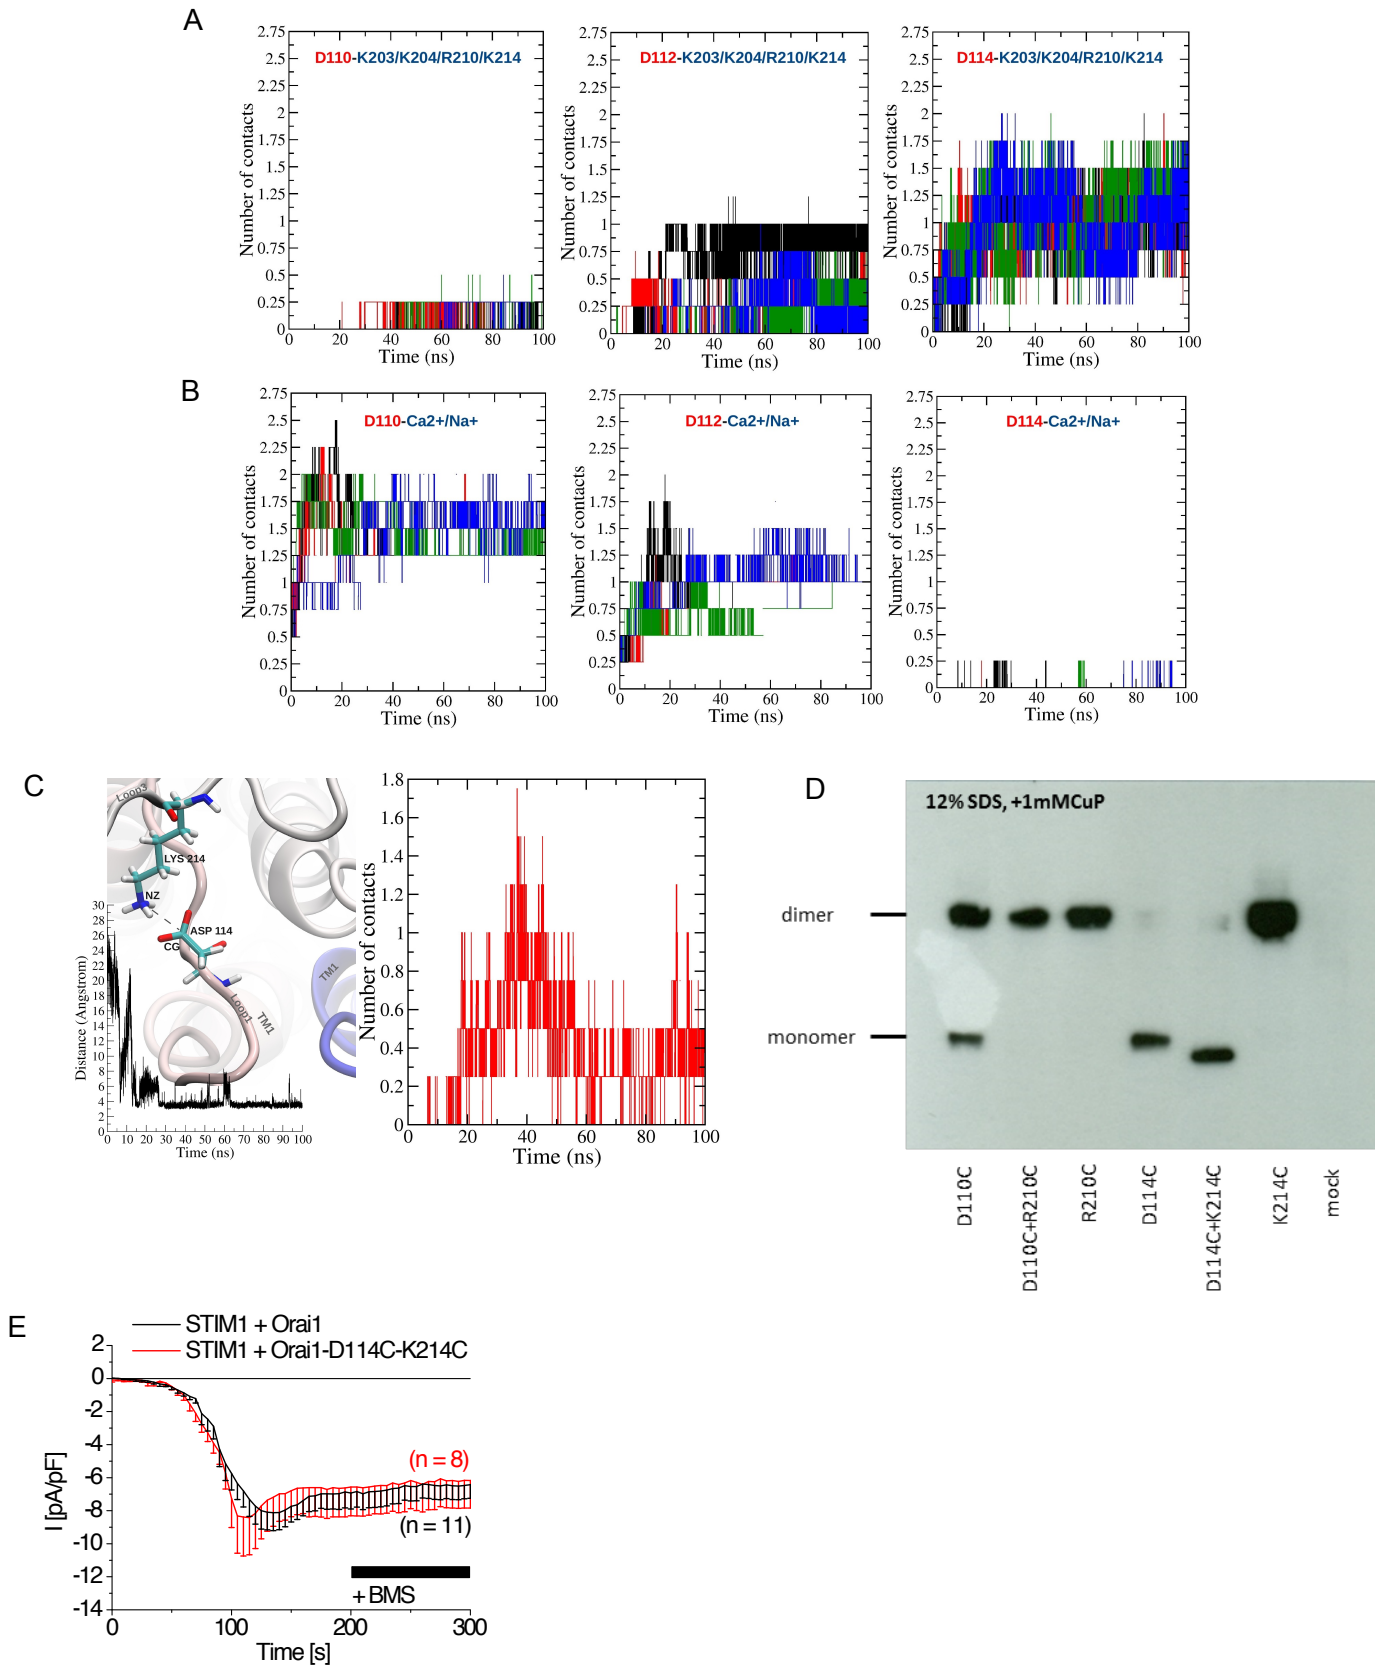

Supplement: NIHMS70408-supplement-Supplementary_Figures.pdf [file NIHMS70408-supplement-Supplementary_Figures.pdf]
